# Supplementary material
Source: MDPI journal article supplement (https://www.mdpi.com/search?q=cancers-11-00450)
Supplement: s001 [file cancers-11-00450-s001.pdf]

Supplementary Information:

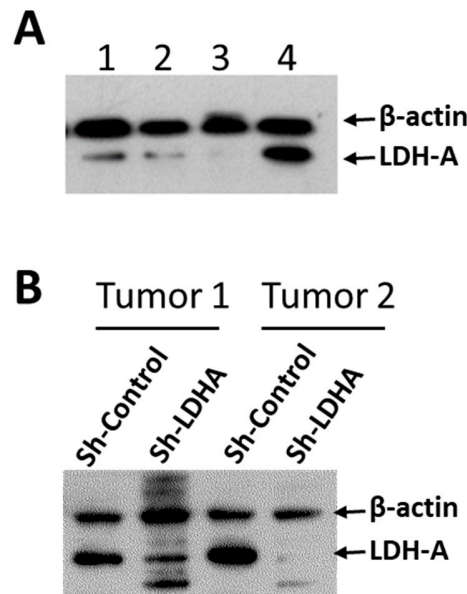

**Figure S1.** Western blotting with antibody against LDH-A is shown on B16-GFP versus shLDH melanoma cells. (A) In cell line before treatment. 1: B16F10 experiment 1 + shLDH; 2: B16F10 experiment 2 + shLDH; 3: B16F10 experiment 3 + shLDH; 4: B16F10 experiment 4 + Scramble shRNA. β-Actin as control. Cell line 3 was used as shLDH and cell line 4 was used as control in the subsequent experiments. (B) In implanted tumors.

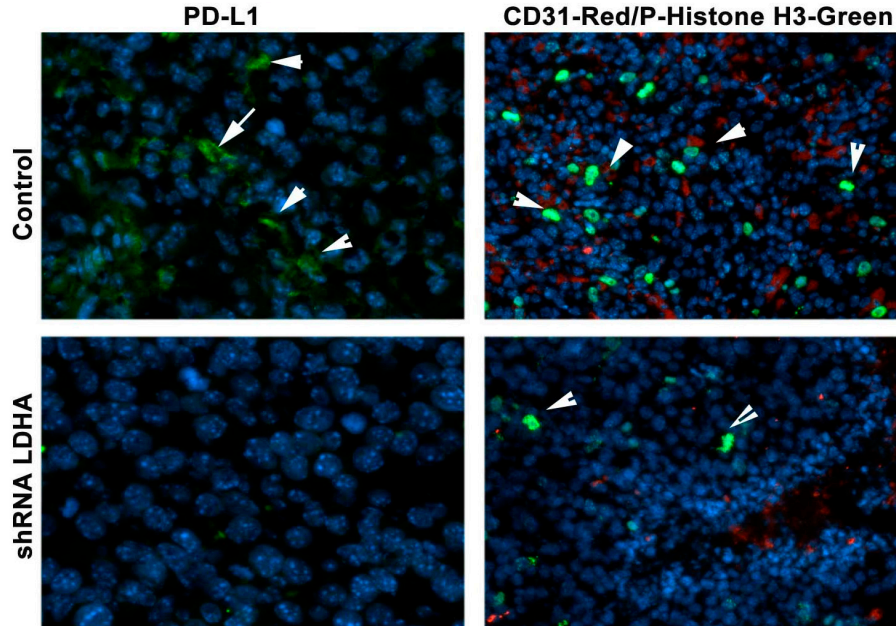

**Figure S2.** Intra-tumoral PD-L1, CD31 and P-HH3 expressions. A. Immunofluorescence staining with antibodies against PD-L1 on tumor tissues from B16 or B16-sh. Green: PD-L1; Blue: melanoma cell nuclei. ( $n = 2$  to 3 per group). Analysis of tumor tissue slices by IFC for angiogenesis (indicated as CD31 expression) and proliferation (P-Histone H3). Immunofluorescence staining with antibodies against CD31 and histone H3 on tumor tissues from B16 or B16-sh ( $n = 2$  to 3 per group).

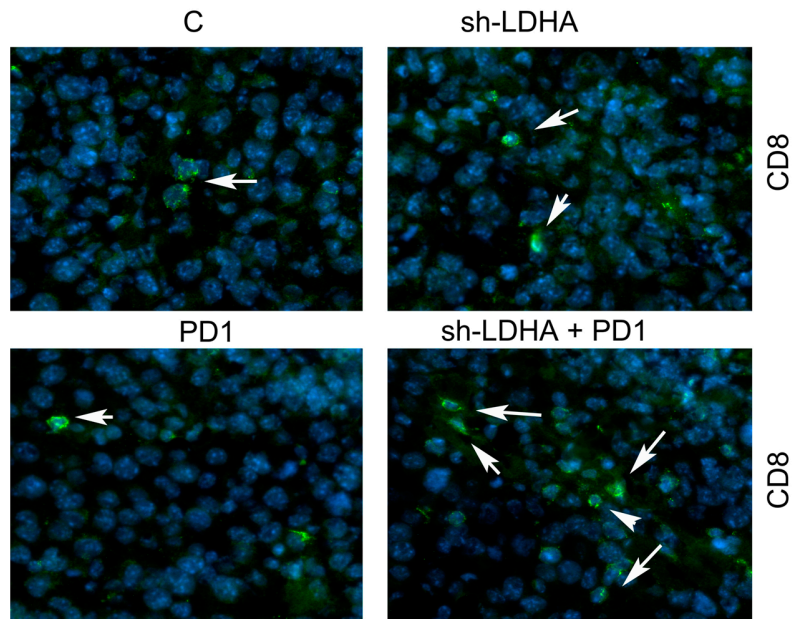

**Figure S3.** Intra-tumoral infiltration of CD8<sup>+</sup> T cells Immunofluorescence staining with antibodies against CD8 on tumor tissues from B16 or B16-sh treated or untreated with anti-PD-1.

### Splenic IL-17<sup>+</sup> CD8<sup>+</sup> (TC17)

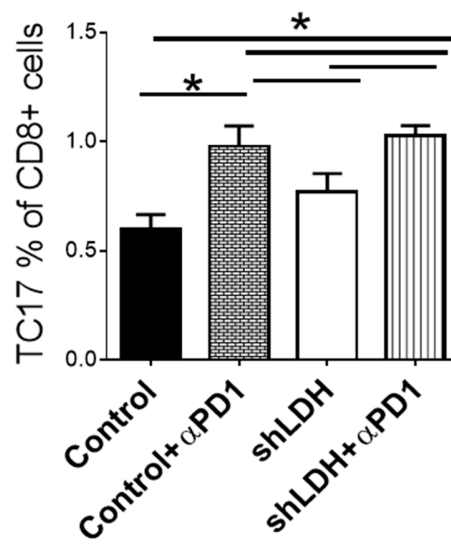

**Supplementary Figure 4.** Increased population of IL-17A<sup>+</sup> CD8<sup>+</sup> (TC17) cells in mice spleen after anti-PD1 treatment. Splenic IL-17A<sup>+</sup> CD8<sup>+</sup> (TC17) cells frequency in different treatment groups.
